# Supplementary material
Source: PubMed Central journal article supplement (PMC7053844)
Supplement: supp_RA119000329_155126_2_supp_454271_q3mwg7.pdf [file supp_RA119000329_155126_2_supp_454271_q3mwg7.pdf]

Supplemental Figure S1

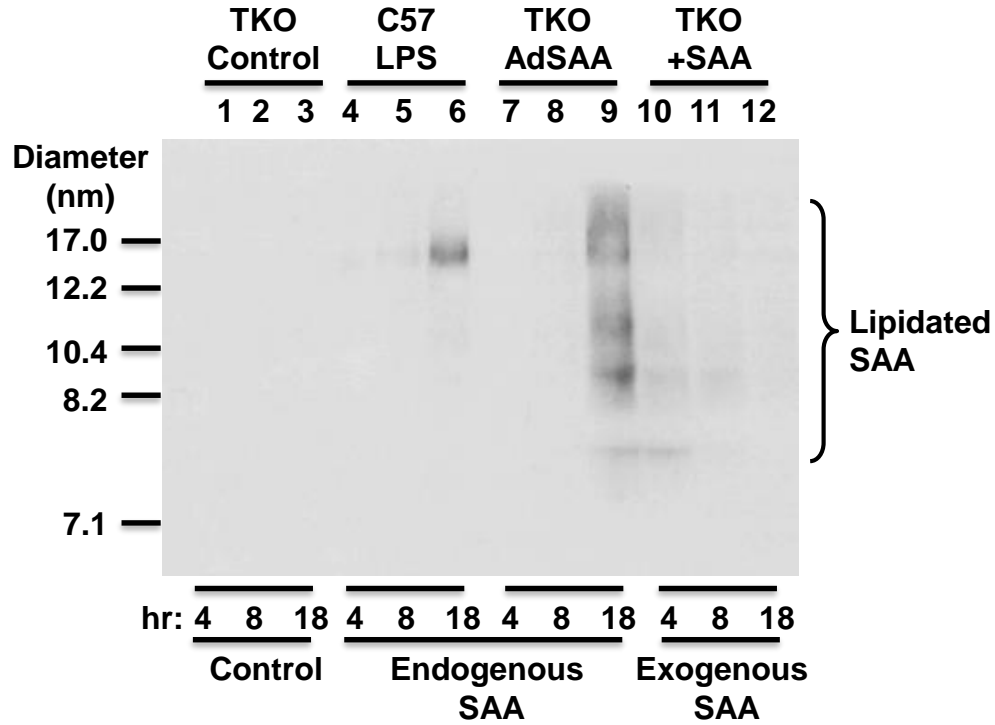

**Supplemental Figure S1:** Immunoblot presented in Figure 1B is shown with lower exposure in order to facilitate visualization of lipidated species in Lane 9.
